# Supplementary material for: Fluorescent sensing of mercury(ii) based on formation of catalytic gold nanoparticles
Source: Royal Society of Chemistry journal article supplement (doi:10.1039/c3an00725a), 2013-01-01
Supplement: c3an00725a.pdf [file c3an00725a.pdf]

# Electronic Supporting Information

for

## Fluorescent sensing of mercury(II) based on formation of catalytic gold nanoparticles

Lixia Yan,<sup>a</sup> Zhaopeng Chen,<sup>\*b</sup> Zhiyang Zhang,<sup>b, c</sup> Chengli Qu,<sup>b</sup>

Lingxin Chen<sup>b</sup> and Dazhong Shen<sup>\*a</sup>

<sup>a</sup> *The Key Lab in Molecular and Nano-materials Probes of the Ministry of Education of China, College of Chemistry, Chemical Engineering and Materials Science, Shandong Normal University, Jinan 250014, P. R. China. Tel: +86 0531 86180740; Fax: +86 053182615258. E-mail: dzshen@sdu.edu.cn (D. Shen)*

<sup>b</sup> *Key Laboratory of Coastal Zone Environmental Processes, Yantai Institute of Coastal Zone Research (YIC), Chinese Academy of Sciences (CAS); Shandong Provincial Key Laboratory of Coastal Zone Environmental Processes, YICCAS, Yantai 264003, P. R. China. Fax: +86 0535 2109133; Tel: +86 0535 2109133; E-mail: zhpchen@yic.ac.cn (Z. Chen)*

<sup>c</sup> *Graduate University of Chinese Academy of Sciences, Beijing 100049, P. R. China*

### Experimental Section

#### Chemicals and apparatus

Hydrogen tetrachloroaurate(III) dehydrate, trisodium citrate, HgCl<sub>2</sub> and *o*-phenylenediamine were obtained from Sinopharm<sup>®</sup> Chemical Reagent (China). All other chemicals were analytical reagent grade or better. Solutions were prepared with deionized water (18.2 MΩ, Pall<sup>®</sup> Cascada). Fluorescence spectra were performed on Fluoromax-4<sup>®</sup> (Horiba Scientific). Absorption spectra of AuNPs were scanned by the UV/visible spectrophotometer (Beckman Coulter<sup>®</sup> DU-800, USA). Images of dispersed AuNPs were achieved by transmission electron microscopy (TEM, JEOL<sup>®</sup> JEM-1230, Japan) operated at 100 kV.

#### Gold nanoparticles synthesis

Citrate-capped gold nanoparticles were prepared by means of the chemical reduction

29 of  $\text{HAuCl}_4$  by citrate in the liquid phase. Briefly, 200 mL aqueous solution of 0.25  
30 mM  $\text{HAuCl}_4$  was first brought to boil with vigorous stirring. Then 1.2 mL trisodium  
31 citrate with a concentration of 50 mM was added rapidly and the mixture was heated  
32 under reflux for another 15 min. During the process, the color changed from pale  
33 yellow to red. Thereafter, the solution was cooled to room temperature while being  
34 stirred continuously. The size of AuNPs, as determined by TEM imaging, was 30 nm  
35 (Fig. S1). The concentration of the synthesized AuNPs was estimated about  $1.4 \times$   
36  $10^{-10}$  M.

### 37 **Procedure**

38 To 900  $\mu\text{L}$  deionized water, 100  $\mu\text{L}$  Britton-Robinson, 10  $\mu\text{L}$   $\text{HgCl}_2$  and 10  $\mu\text{L}$   
39 Polyethylene Glycol (PEG,  $M = 6000$ , 1%), 15  $\mu\text{L}$  AuNPs were successively added.  
40 The solution was incubated for  $\sim 1$  min at room temperature. After that, 10  $\mu\text{L}$   
41 *o*-phenylenediamine with a concentration of 0.21 M was added. The solution was then  
42 transferred for fluorescence spectra scanning after incubating for 25 min at room  
43 temperature.

### 44 **Determination of $\text{Hg}^{2+}$ in drinking water sample**

45 Drinking water collected from our institute was first filtered through a 0.22  $\mu\text{m}$   
46 membrane. To the water sample, few drops of 0.5 M  $\text{HNO}_3$  was added to adjust pH to  
47 5.65. Then 900  $\mu\text{L}$  of water sample was mixed with 100  $\mu\text{L}$  BR buffer, PEG, AuNPs  
48 and *o*-phenylenediamine as described in procedure.

### 49 **Evidence for formation of gold amalgam**

50 In Long's work (Chem. Commun., 2011, 47, 11939), the author verified the formation  
51 of gold amalgam by XPS experiment. In this work, the experiment condition was  
52 almost consistent with that reported in Long's literature. Therefore, we deduced that  
53 gold amalgam also existed in our system. The deduction was further verified by  
54 ICP-MS. The ICP-MS intensities of  $\text{Hg}^{2+}$  ( $10^{-7}$  M) was examined to be 5019, while  
55 the intensities of Hg in supernatant and precipitation after addition of AuNPs to the  
56 solution containing  $10^{-7}$  M  $\text{Hg}^{2+}$  followed by centrifugation were 530 and 4913,  
57 respectively. These results indicated that Hg was enriched on nanoparticles owing to

58 the formation of gold amalgam.

59

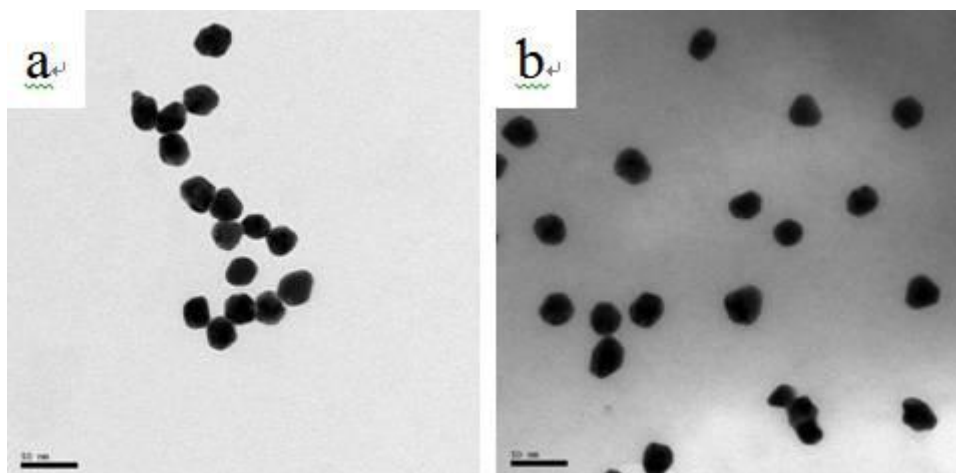

60

61 **Fig. S1** TEM images of synthesized AuNPs (a) and Hg-Au alloys. There is no obvious  
62 difference between AuNPs and Hg-Au nanoparticles.

63

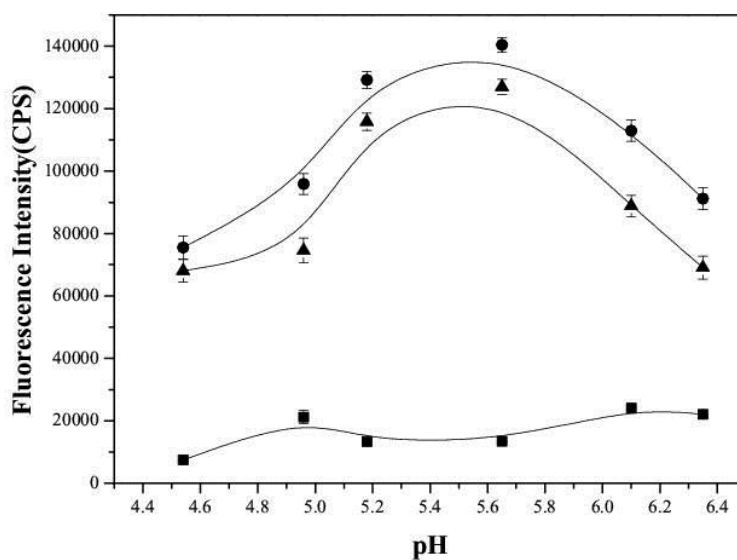

64

65 **Fig. S2** Effect of pH on the fluorescence intensity at 562 nm in the absence (■) and  
66 presence (●) of  $5.0 \times 10^{-8}$  M  $\text{Hg}^{2+}$ . ▲ is the difference between the fluorescence  
67 intensity ( $F_{\text{Hg}} - F_{\text{blank}}$ ). Other conditions: volume of AuNP 15  $\mu\text{L}$ ; PEG 0.01%;  
68 *o*-phenylenediamine 2.1 mM; incubation time 20 min.

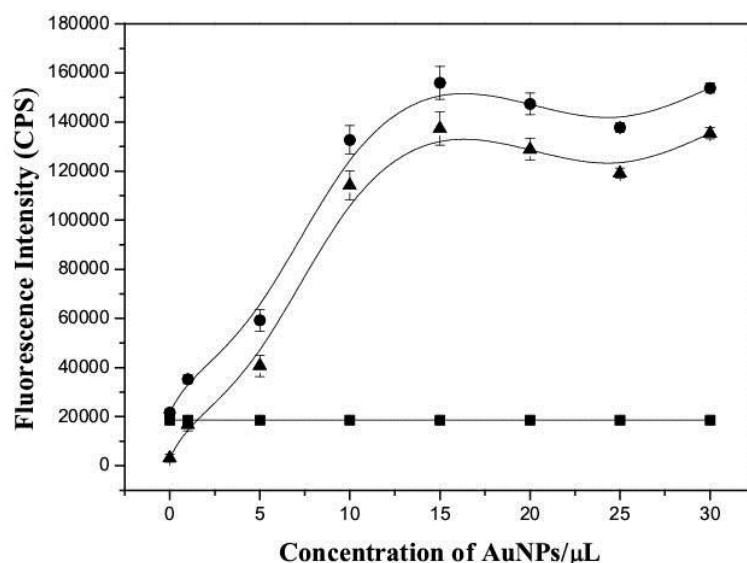

69

70 **Fig. S3** Effect of the volume of AuNPs on the fluorescence intensity at 562 nm in the  
71 absence (■) and presence (●) of  $5.0 \times 10^{-8}$  M  $\text{Hg}^{2+}$ . ▲ is the difference between the  
72 fluorescence intensity ( $F_{\text{Hg}} - F_{\text{blank}}$ ). Other conditions: pH 5.65; PEG 0.01%;  
73 *o*-phenylenediamine 2.1 mM; incubation time 20 min.

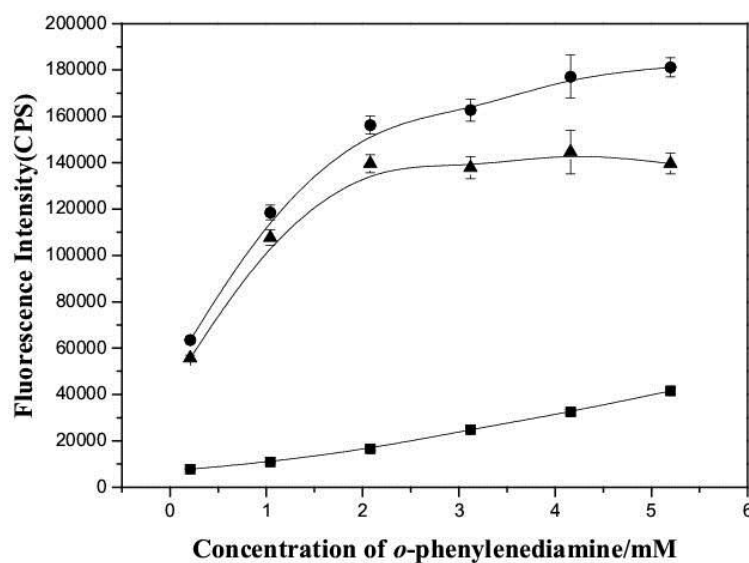

74

75 **Fig. S4** Effect of the concentration of *o*-phenylenediamine on the fluorescence  
76 intensity at 562 nm in the absence (■) and presence (●) of  $5.0 \times 10^{-8}$  M  $\text{Hg}^{2+}$ . ▲ is  
77 the difference between the fluorescence intensity ( $F_{\text{Hg}} - F_{\text{blank}}$ ). Other conditions: pH  
78 5.65; PEG 0.01%; volume of AuNP 15  $\mu\text{L}$ ; incubation time 20 min.

79 The signals of blank and sample both increased with the concentrations of  
80 *o*-phenylenediamine. The sensitivity depends on the signal-to-noise ratio. When the  
81 concentration of *o*-phenylenediamine was 2.1 mM, the difference of the signals

82 between the presence and the absence of  $\text{Hg}^{2+}$  was obvious, meanwhile, the  
83 signal-to-noise ratio was larger than what can be achieved by using 3 mM  
84 *o*-phenylenediamine. So 2.1 mM *o*-phenylenediamine was selected.

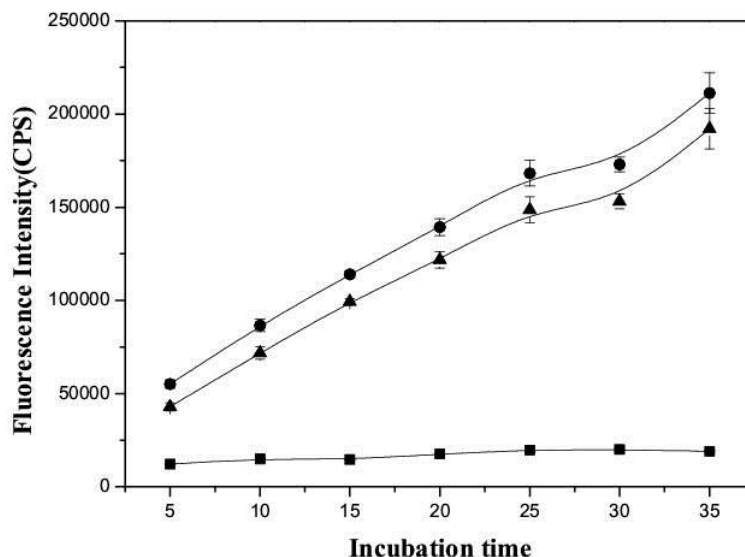

85

86 **Fig. S5** Effect of incubation time on the fluorescence intensity at 562 nm in the  
87 absence (■) and presence (●) of  $5.0 \times 10^{-8}$  M  $\text{Hg}^{2+}$ . ▲ is the difference between the  
88 fluorescence intensity ( $F_{\text{Hg}} - F_{\text{blank}}$ ). Other conditions: pH 5.65; PEG 0.01%; volume  
89 of AuNP 15  $\mu\text{L}$ ; *o*-phenylenediamine 2.1 mM.

90 The signal value increased linearly with the incubation time. Theoretically, the  
91 sensitivity depends on the signal-to-noise ratio. For the signals of blank and sample  
92 both increased linearly with the incubation time, we can conclude that the increasing  
93 incubation time would not improve the sensitivity. We chose 20 min as the optimal  
94 incubation time because '20 min' was easy to be controlled accurately. Assumed that  
95 the whole incubation time error is 30 s, the detection error is  $0.5/20 \times 100\% = 2.5\%$ . Of  
96 course, less incubation time might result in more error, and more incubation time is  
97 time-consuming.

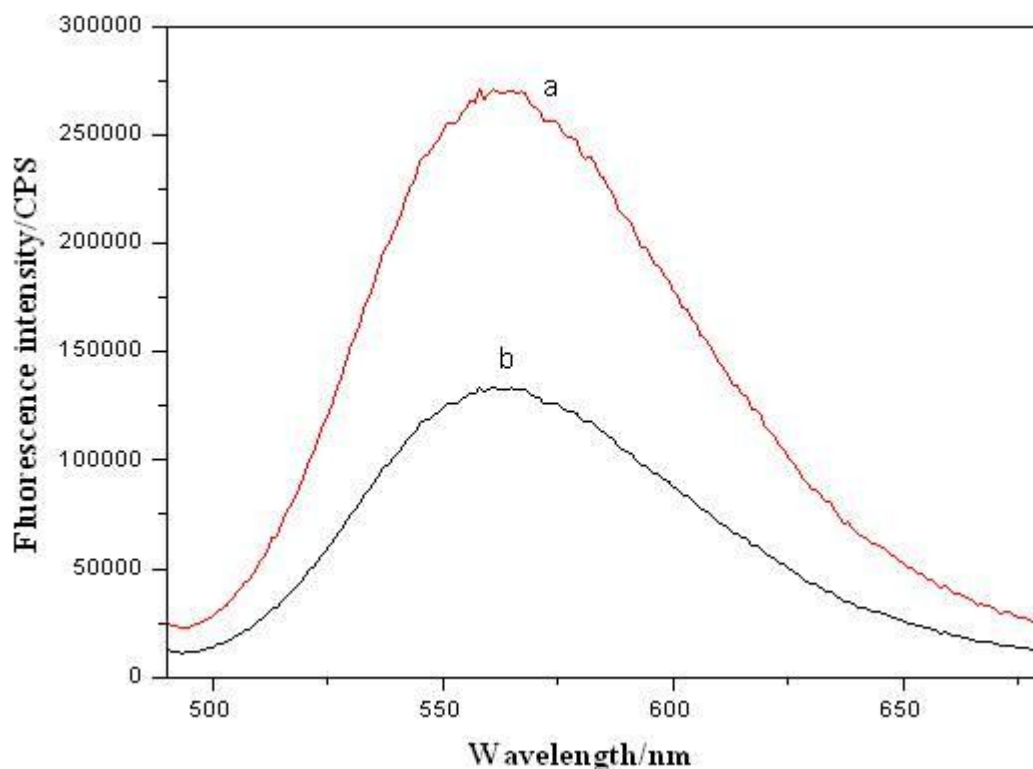

98

99 **Fig. S6** Fluorescent emission spectra for sensing of  $10^{-7}$   $\text{Hg}^{2+}$  (a) and  $1.04 \mu\text{M}$   
100 2,3-diaminophenazine (b). (using for illustrating the effect of the concentration of  
101 dissolved oxygen)

102 The fluorescence intensity at 562 nm recorded for the BR solution containing  
103  $1.04 \times 10^{-6}$  M 2,3-diaminophenazine was about half of the intensity for the  
104 determination of  $10^{-7}$  M  $\text{Hg}^{2+}$ . Assumed that the fluorescence intensity was linear with  
105 the concentration of 2,3-diaminophenazine, the 2,3-diaminophenazine produced in the  
106 determination of  $10^{-7}$  M  $\text{Hg}^{2+}$  was about  $2.08 \times 10^{-6}$  M. For the saturation  
107 concentration of oxygen in water is about  $2.58 \times 10^{-4}$  M, These results meant that only  
108 1.63% dissolved oxygen was consumed. We concluded that the concentration of  
109 dissolved oxygen was sufficient for determination of different concentration of  $\text{Hg}^{2+}$   
110 less than  $10^{-7}$  M and did not change in the whole sensing process. The conclusion was  
111 also supported by the effect of incubation time on the fluorescence intensity. That the  
112 fluorescence intensity was almost linear with the increase of incubation time indicated  
113 the catalytic reaction rate was steady, demonstrating all the concentration of substrates  
114 were almost unchanged.

115

116 **Table S1** Fluorescence intensity before and after pumping oxygen to the sensing system in the  
117 presence of  $\text{Hg}^{2+}$  (0.1  $\mu\text{M}$ ) or not. the standard deviation of each sample was obtained by three  
118 measurements.

| Samples                                   | Fluorescence Intensity before<br>addition of $\text{Hg}^{2+}$ /CPS | Fluorescence Intensity after<br>addition of $1 \times 10^{-7} \text{Hg}^{2+}$ /CPS |
|-------------------------------------------|--------------------------------------------------------------------|------------------------------------------------------------------------------------|
| Sample after pumping<br>oxygen for 20 min | $14798 \pm 341.863$                                                | $288680 \pm 13113.45$                                                              |
| Sample without<br>pumping oxygen          | $14699 \pm 262.981$                                                | $270330 \pm 10855.27$                                                              |

119 The fluorescence intensities at 562 nm before and after pumping oxygen to the  
120 test solution for 20 min were almost the same, indicating dissolved oxygen in samples  
121 was saturated before pumping of oxygen.

122 Fig. S6 and Table S1 indicated that need no approach to control the concentration  
123 of dissolved oxygen for sensing of  $\text{Hg}^{2+}$ .
